# Supplementary material for: Rational design and synthesis of chitosan–quinoa polysaccharide composite aerogel and its adsorption properties for Congo red and methylene blue
Source: Royal Society of Chemistry journal article supplement (doi:10.1039/d1nj01212f), 2021-01-01
Supplement: d1nj01212f1.pdf [file d1nj01212f1.pdf]

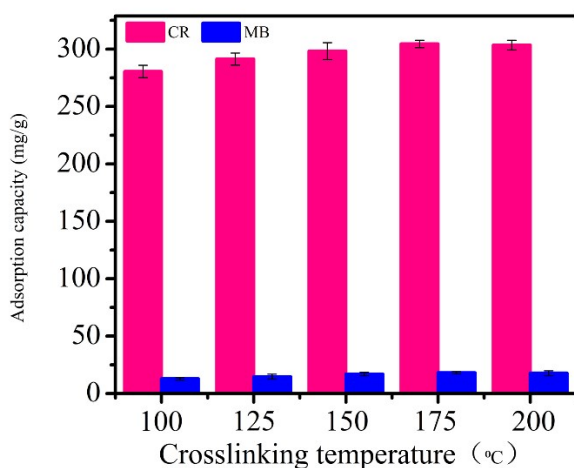

**Fig. 1** Effect of crosslinking temperature on the removal of CR and MB by CSQS composite aerogel

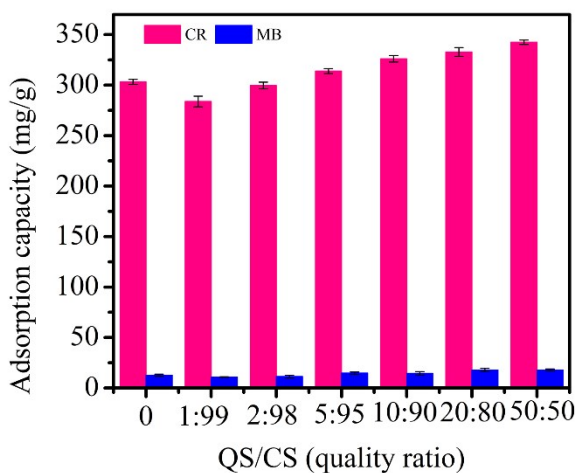

**Fig. 2** Effect of QS/CS ratio on the removal of CR and MB by CSQS composite aerogel

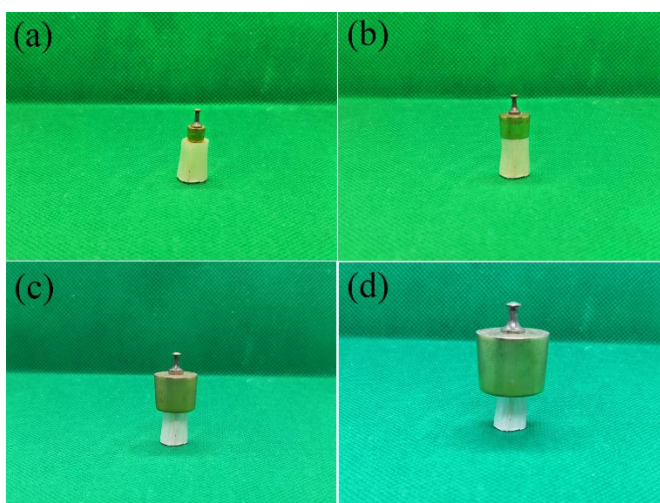

**Fig. 3** Mechanical strength of CSQS composite aerogel : (a) 5 g; (b) 10 g; (c) 20 g; (d) 100 g

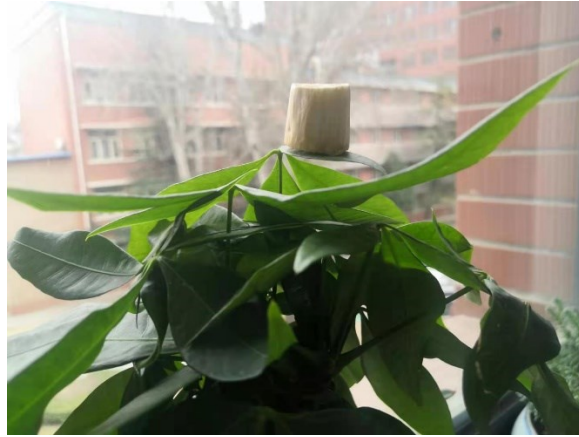

**Fig. 4** A 10 cm<sup>3</sup> CSQS composite aerogel ( $\rho = 0.16\text{mg/cm}^3$ ) stands on the tip of leaf

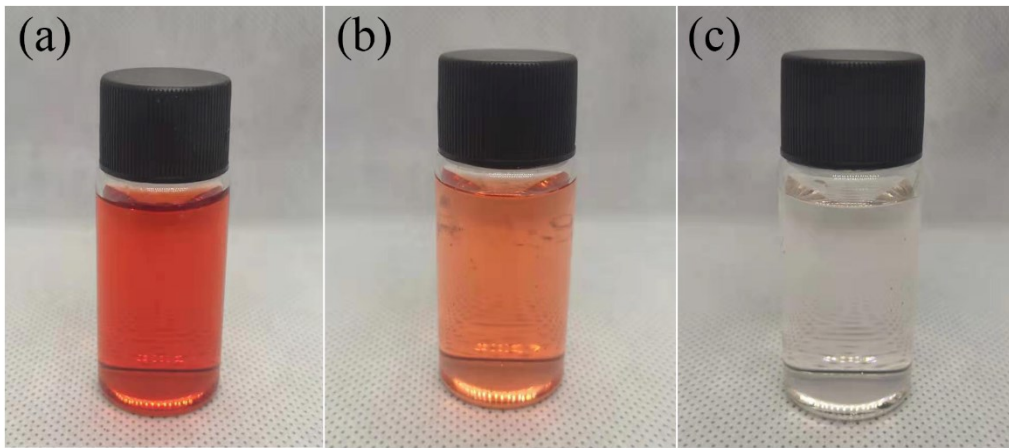

**Fig. 5** Effect of different adsorbents dosage on the adsorption of CR: (a) 0 mg; (b) 10 mg; (c) 20 mg

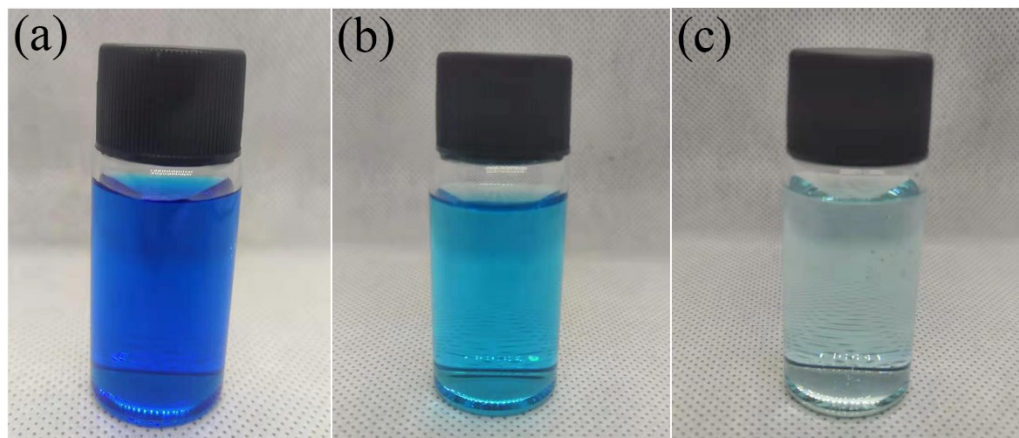

**Fig. 6** Effect of different adsorbents dosage on the adsorption of MB: (a) 0 mg; (b) 10 mg; (c) 20 mg
